# Supplementary material for: Capacity enhancement of polylithiated functionalized boron nitride nanotubes: an efficient hydrogen storage medium
Source: Royal Society of Chemistry journal article supplement (doi:10.1039/d0cp01237h), 2020-01-01
Supplement: d0cp01237h1.pdf [file d0cp01237h1.pdf]

## Capacity Enhancement of Polythiated Functionalized Boron Nitride Nanotubes: An Efficient Hydrogen Storage Medium

Puspamitra Panigrahi<sup>\*1</sup>, Ashok Kumar<sup>1</sup>, Hyeonhu Bae<sup>2</sup>, Hoonkyung Lee<sup>2</sup>, Rajeev Ahuja<sup>3, 4</sup> and Tanveer Hussain<sup>\*5</sup>

<sup>1</sup>Centre for Clean Energy and Nano Convergence, Hindustan Institute of Technology and Science, Chennai 603103, Tamil Nadu, India.

<sup>2</sup>Department of Physics, Konkuk University, Seoul 05029, Republic of Korea

<sup>3</sup>Condensed Matter Theory Group, Department of Physics and Astronomy, Box 516, Uppsala University, S-75120 Uppsala, Sweden

<sup>4</sup>Applied Materials Physics, Department of Materials and Engineering, Royal Institute of Technology (KTH), S-100 44 Stockholm, Sweden

<sup>5</sup>School of Molecular Sciences, The University of Western Australia, Perth, WA 6009, Australia

Corresponding author: [tanveer.hussain@uwa.edu.au](mailto:tanveer.hussain@uwa.edu.au), [akshaymitra@gmail.com](mailto:akshaymitra@gmail.com)

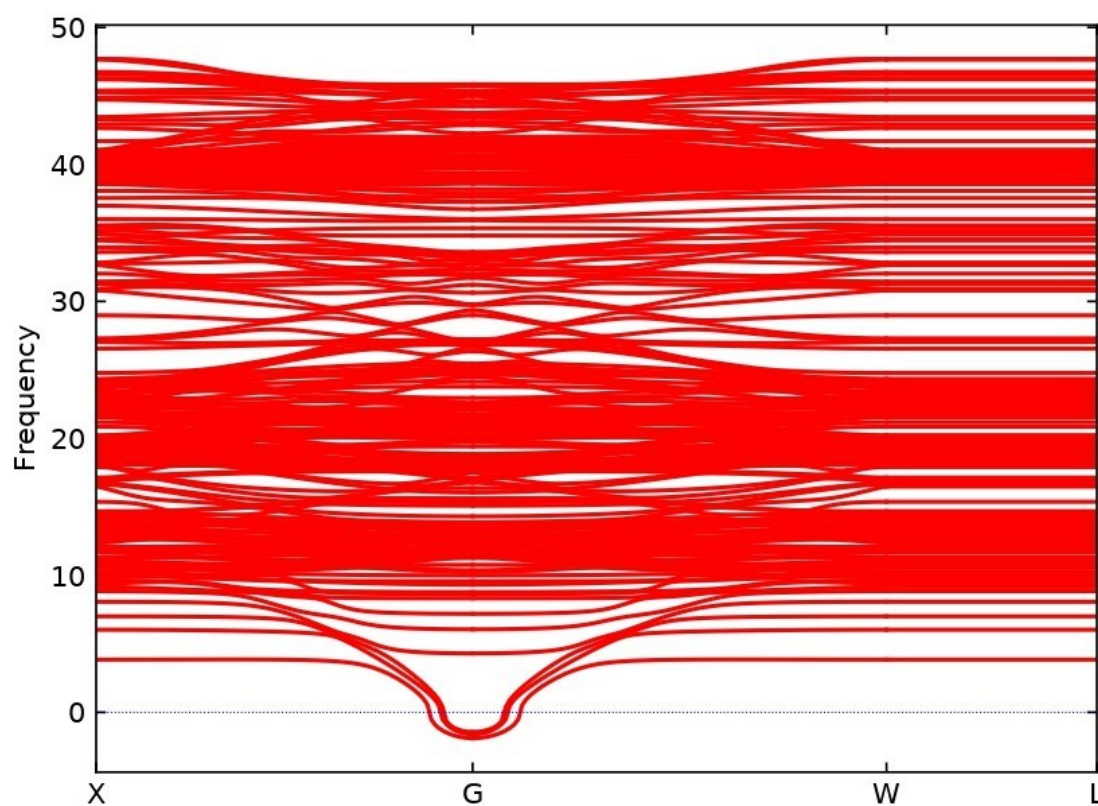

Fig. S1: Phonon vibration modes along different wave vectors along with gamma point.
